# Supplementary material for: Critical assessment of human metabolic pathway databases: a stepping stone for future integration
Source: Springer Nature journal article supplement (doi:10.1186/1752-0509-5-165), 2011-10-14
Supplement: Additional file 1 [file 1752-0509-5-165-s1.pdf]

## Additional file 1 – Transferred and obsolete identifiers and EC numbers per database

### Genes

| Database | Number of Entrez Gene IDs |          |
|----------|---------------------------|----------|
|          | transferred <sup>a</sup>  | obsolete |
| BiGG     | 10 (1)                    | 5        |
| EHMN     | 4 (1)                     | 24       |
| HumanCyc | 38 (19)                   | 5        |
| KEGG     | 1 (0)                     | 0        |
| Reactome | 10 (9)                    | 21       |

| Database | Total number of Entrez Gene IDs |              |
|----------|---------------------------------|--------------|
|          | before update                   | after update |
| BiGG     | 1496                            | 1490         |
| EHMN     | 2517                            | 2492         |
| HumanCyc | 3233                            | 3209         |
| KEGG     | 1535                            | 1535         |
| Reactome | 1210                            | 1180         |

<sup>a</sup> The number of the genes that were transferred to an ID that was already present in the set of Entrez Gene IDs of the particular database is indicated between brackets.

### EC numbers

| Database | Number of EC numbers |             |          |
|----------|----------------------|-------------|----------|
|          | incomplete           | transferred | obsolete |
| BiGG     | 2                    | 8           | 1        |
| EHMN     | 43                   | 4           | 1        |
| HumanCyc | 34                   | 2           | 0        |
| KEGG     | 34                   | 0           | 0        |
| Reactome | 19                   | 3           | 0        |

| Database | Total number of EC numbers |              |
|----------|----------------------------|--------------|
|          | before update              | after update |
| BiGG     | 644                        | 645          |
| EHMN     | 936                        | 940          |
| HumanCyc | 1212                       | 1215         |
| KEGG     | 726                        | 726          |
| Reactome | 354                        | 356          |

Incomplete EC numbers were not taken into account in the comparison because of their ambiguity.

Some EC numbers were transferred to multiple new EC numbers. In Reactome there are two cases in which the new EC number was already included in Reactome.

### Metabolites

| Number of Database | KEGG Compound         |             |          | KEGG Glycan           |          | CAS                   | ChEBI       |          | PubChem Compound                                               |                |
|--------------------|-----------------------|-------------|----------|-----------------------|----------|-----------------------|-------------|----------|----------------------------------------------------------------|----------------|
|                    | incorrectly formatted | transferred | obsolete | incorrectly formatted | obsolete | incorrectly formatted | transferred | obsolete | PubChem Substance IDs that do not map to a PubChem Compound ID | obsolete       |
| BiGG               | 8 <sup>b</sup>        | 14          | 21       | 50                    | 2        | 7                     | x           | x        | x                                                              | 1              |
| EHMN               | 0                     | 28          | 4        | 0                     | 0        | 0                     | 3           | 0        | 35                                                             | 0 <sup>c</sup> |
| HumanCyc           | 0                     | 9           | 0        | x                     | x        | 2 <sup>b</sup>        | 1           | 39       | x                                                              | 106            |
| KEGG               | 0                     | 0           | 0        | 0                     | 0        | 0                     | 0           | 0        | 259                                                            | 0 <sup>c</sup> |
| Reactome           | 0                     | 8           | 1        | x                     | x        | x                     | 0           | 0        | 12                                                             | 0 <sup>c</sup> |

An 'x' indicates that the particular identifier is not available for this database.

<sup>b</sup> One could not be corrected and was therefore removed

<sup>c</sup> As the CID-SID.gz file from PubChem was used to convert the PubChem Substance IDs to PubChem Compound IDs these will naturally be up-to-date.
