# Supplementary material for: Critical assessment of human metabolic pathway databases: a stepping stone for future integration
Source: Springer Nature journal article supplement (doi:10.1186/1752-0509-5-165), 2011-10-14
Supplement: Additional file 9 [file 1752-0509-5-165-s9.pdf]

## Additional file 9 – Metabolite counts per database

| Database | total number of metabolites | % of metabolites without a chemical formula | % of metabolites without identifier | # of metabolites with identifier | % metabolites with |      |       |                  |     |
|----------|-----------------------------|---------------------------------------------|-------------------------------------|----------------------------------|--------------------|------|-------|------------------|-----|
|          |                             |                                             |                                     |                                  | KEGG Compound      | KEGG | ChEBI | PubChem Compound | CAS |
| BiGG     | 1485                        | 0                                           | 34                                  | 984                              | 87                 | 15   | 0     | 3                | 57  |
| EHMN     | 2676                        | 10                                          | 32                                  | 1830                             | 91                 | 6    | 49    | 33               | 40  |
| HumanCyc | 1681                        | 18                                          | 25                                  | 1258                             | 88                 | 0    | 49    | 77               | 40  |
| KEGG     | 1553                        | 10                                          | 0                                   | 1553                             | 92                 | 14   | 67    | 75               | 47  |
| Reactome | 984                         | 44                                          | 31                                  | 682                              | 85                 | 0    | 98    | 54               | 0   |

We also included the instances of metabolite classes for HumanCyc and members of sets for Reactome, see Materials and Methods. The percentages of the different types of metabolite identifiers are calculated w.r.t. the number of metabolites with at least one identifier. Note that in KEGG each metabolite has at least an identifier from one of its own metabolite databases, KEGG Compound and KEGG Glycan. For 16% of the metabolites of KEGG there is no other identifier provided.
